# Supplementary material
Source: Springer Nature journal article supplement (https://www.springermedizin.de/resource/supplementary/12882_2004_38_MOESM1_ESM.pdf/9454822)

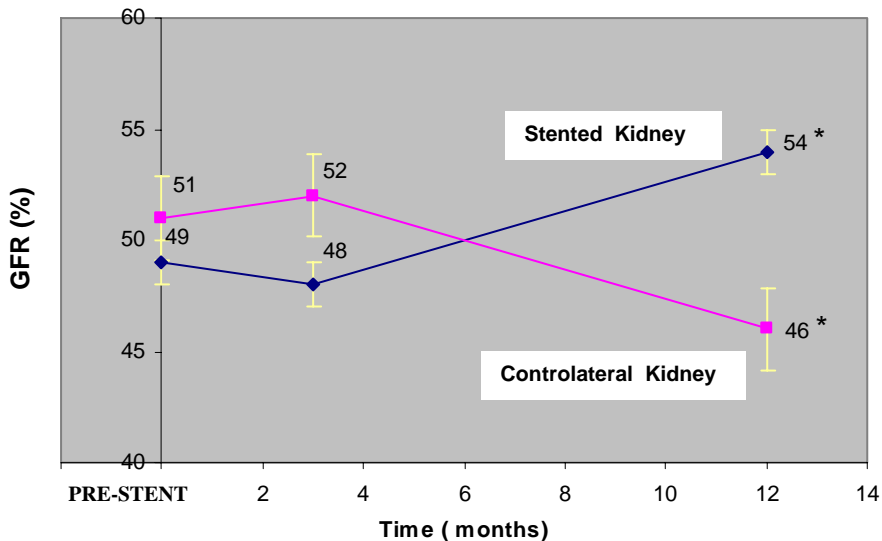

\* Significance of the difference compared to basal value ( $p < 0,05$ )

Supplement: MOESM1 [file 9454822]
